1 Exploring the Spatial Distribution of Persistent  
2 SARS-CoV-2 Mutations - Leveraging mobility  
3 data for targeted sampling

4 Riccardo Spott<sup>1,\*</sup>, Mathias W. Pletz<sup>1,2</sup>, Carolin Fleischmann-Struzek<sup>1,2</sup>, Aurelia Kimmig<sup>1</sup>,  
5 Christiane Hadlich<sup>3</sup>, Mathias Hauert<sup>3</sup>, Mara Lohde<sup>1</sup>, Mateusz Jundzill<sup>1</sup>, Mike Marquet<sup>1</sup>, Petra  
6 Dickmann<sup>4</sup>, Ruben Schüchner<sup>5</sup>, Martin Hölzer<sup>6</sup>, Denise Kühnert<sup>7,8</sup>, Christian Brandt<sup>1</sup>

7  
8 <sup>1</sup> Institute for Infectious Diseases and Infection Control, Jena University Hospital, Jena,  
9 Germany

10 <sup>2</sup> Center for Sepsis Control and Care, Jena University Hospital/Friedrich Schiller University  
11 Jena, Jena, Germany

12 <sup>3</sup> SMA Development GmbH - epicinsights Agentur für Künstliche Intelligenz und Big Data  
13 Analytics, Jena, Germany

14 <sup>4</sup> Department of Anaesthesiology and Intensive Care, Jena University Hospital, Jena,  
15 Germany

16 <sup>5</sup> Thuringian State Authority for Consumer Protection, Department Health Protection

17 <sup>6</sup> Methodology and Research Infrastructure, Genome Competence Center (MF1), Robert  
18 Koch Institute, Berlin, Germany

19 <sup>7</sup> Centre for Artificial Intelligence in Public Health Research, Robert Koch Institute, Berlin,  
20 Germany

21 <sup>8</sup> Transmission, Infection, Diversification and Evolution Group, Max Planck Institute for  
22 Geoanthropology, 07745 Jena, Germany.

23 \* Corresponding Author

24 Short Title

25 Mobility data for Surveillance

## 26 Keywords

27 Nanopore sequencing; SARS-CoV-2; WGS; mobility data; cluster tracking

## 28 Abstract

29 Given the rapid cross-country spread of SARS-CoV-2 and the resulting difficulty in tracking  
30 lineage spread, we investigated the potential of combining mobile service data and fine-  
31 granular metadata (such as postal codes and genomic data) to advance integrated genomic  
32 surveillance of the pandemic in the federal state of Thuringia, Germany. We sequenced over  
33 6,500 SARS-CoV-2 Alpha genomes (B.1.1.7) across seven months within Thuringia while  
34 collecting patients' isolation dates and postal codes. Our dataset is complemented by over  
35 66,000 publicly available German Alpha genomes and mobile service data for Thuringia. We  
36 identified the existence and spread of nine persistent mutation variants within the Alpha  
37 lineage, seven of which formed separate phylogenetic clusters with different spreading  
38 patterns in Thuringia. The remaining two are sub-clusters. Mobile service data can indicate  
39 these clusters' spread and highlight a potential sampling bias, especially of low-prevalence  
40 variants. Thereby, mobile service data can be used either retrospectively to assess  
41 surveillance coverage and efficiency from already collected data or to actively guide part of a  
42 surveillance sampling process to districts where these variants are expected to emerge. The  
43 latter concept was successfully implemented as a proof-of-concept for a mobility-guided  
44 sampling strategy in response to the surveillance of Omicron sublineage BQ.1.1. The  
45 combination of mobile service data and SARS-CoV-2 surveillance by genome sequencing is  
46 a valuable tool for more targeted and responsive surveillance.

## 47 Introduction

48 On March 11, 2020, the World Health Organization (WHO) classified the SARS-CoV-2 virus  
49 (Severe Acute Respiratory Syndrome - Corona Virus - 2) as a global pandemic due to its  
50 rapid spread and high infection rate.<sup>1</sup> The airborne virus has since caused significant  
51 morbidity and mortality worldwide (<https://covid19.who.int/>). In an attempt to control its  
52 spread, many countries initiated comprehensive surveillance efforts with molecular  
53 techniques such as Polymerase Chain Reaction (PCR) and Whole Genome Sequencing  
54 (WGS).<sup>2,3</sup> Consequently, nearly 15.8 million SARS-CoV-2 sequences have been deposited  
55 into the "Global Initiative on Sharing All Influenza Data" database (as of July 21, 2023,  
56 GISAID). Many research groups have undertaken studies examining the viral spread by  
57 integrating sequencing and epidemiological data to monitor the pandemic and investigate  
58 local outbreaks.<sup>4,5</sup> Most of these local projects are part of national surveillance programs  
59 such as the UK's Genomics Consortium (COG-UK) or "national genomic surveillance" in the  
60 USA.<sup>2,6</sup> In Germany, the "Coronavirus-Surveillanceverordnung" (CorSurV) enacted by the  
61 State Ministry of Health on January 19, 2021, mandated that laboratories with sequencing  
62 capabilities process SARS-CoV-2-positive samples, offering financial compensation until  
63 April 2023.<sup>3</sup>

64 Bioinformatics workflows developed in Germany, such as poreCov (for Oxford Nanopore  
65 data) and CoVpipe2 (for Illumina data), reconstruct SARS-CoV-2 consensus genomes from  
66 the sequencing data and prepare the results for upload and submission to the Robert Koch  
67 Institute (RKI).<sup>7,8</sup> As the German government's public health and biomedical research  
68 institute responsible for disease control and prevention, the RKI collected the genomes via  
69 the German Electronic Sequence Data Hub (DESH) and integrated them with additional  
70 epidemiological information to provide an up-to-date overview of the ongoing viral spread.  
71 For keeping track of the rapid SARS-CoV-2 evolution, PANGO (Phylogenetic Assignment of  
72 Named Global Outbreak) provides a standard naming convention based on unique mutation  
73 profiles and further criteria, resulting in the classification of over 3,660 lineages (as of August  
74 2023).<sup>9,10</sup> Additionally, the WHO classified important viral lineages as "Variants of Concern"  
75 (VOC), "Variants of Interest" (VOI), or "Variants under Monitoring" (VUM), using Greek  
76 designations in the past (e.g., "Alpha" (Pango lineage main designation B.1.1.7) or  
77 "Omicron" (Pango lineage main designation B.1.1.529)). Further, the WHO also de-  
78 escalated former VOCs to reflect the current SARS-CoV-2 variant landscape better. The first  
79 defined VOC (now de-escalated), the Alpha lineage, rapidly replaced almost all previously  
80 circulating lineages globally by the end of 2020 until the VOC Delta (main lineage B.1.617.2)  
81 replaced it in mid-2021.<sup>11-13</sup>

82 To predict or monitor the rapid viral spread throughout regions, various data types, like travel  
83 data, passenger volumes, or passive wastewater monitoring were examined previously.<sup>14-16</sup>  
84 Furthermore, different studies explored mobility data with genomic data to retrace the origin  
85 and spatial expanse of Alpha or utilized geolocation data to model the spread in metropolitan  
86 areas to recreate case trajectories and the impact of mobility restrictions.<sup>17,18</sup> Mobility data  
87 was also used in Germany during the pandemic, revealing that lockdowns leave distant parts  
88 of the country less connected due to the sharp decline in long-distance travel.<sup>19</sup> These  
89 studies focused on analyzing residential movement and contact tracing to evaluate and  
90 inform health policies but were not applied to active molecular surveillance.  
91 Here, we investigated whether mobile service data and fine-granular metadata (such as  
92 postal codes and genomic data) can help predict the spread of the Alpha lineage or guide  
93 the sampling for more targeted genomic surveillance with a focus on the German federal  
94 state of Thuringia.

## 95 Results

96 The Alpha lineage spread rapidly through Thuringia, showing a pattern  
97 similar to its nationwide spread

98 Thuringia is a rural federal state in central Germany with a population of 2.1 million and no  
99 major airports (overview of Thuringia's population density in Supplementary Figure S1). We  
100 investigated if the spread of the Alpha lineage of SARS-CoV-2 behaved differently compared  
101 to the whole of Germany. To understand its spread, we used 289,487 public SARS-CoV-2  
102 genomes from Germany (excluding Thuringia; including 137,024 Alpha genomes) and 7,394  
103 genomes from our own sequencing data for Thuringia (including 6,307 Alpha genomes) to  
104 track Alpha's occurrence from December 2020 to August 2021 (see Figure 1,  
105 Supplementary Figure S2, and Supplementary Tables S1 and S2; for details, see Methods  
106 section "Alpha spread datasets"). For Thuringia, district-level data (full postal code) per  
107 genome were available, whereas, for Germany, only postal code data of the sending  
108 laboratories (referred to as "primary diagnostic laboratory" by the RKI where the SARS-CoV-  
109 2 positive sample was detected) and sequencing laboratories were publicly available.

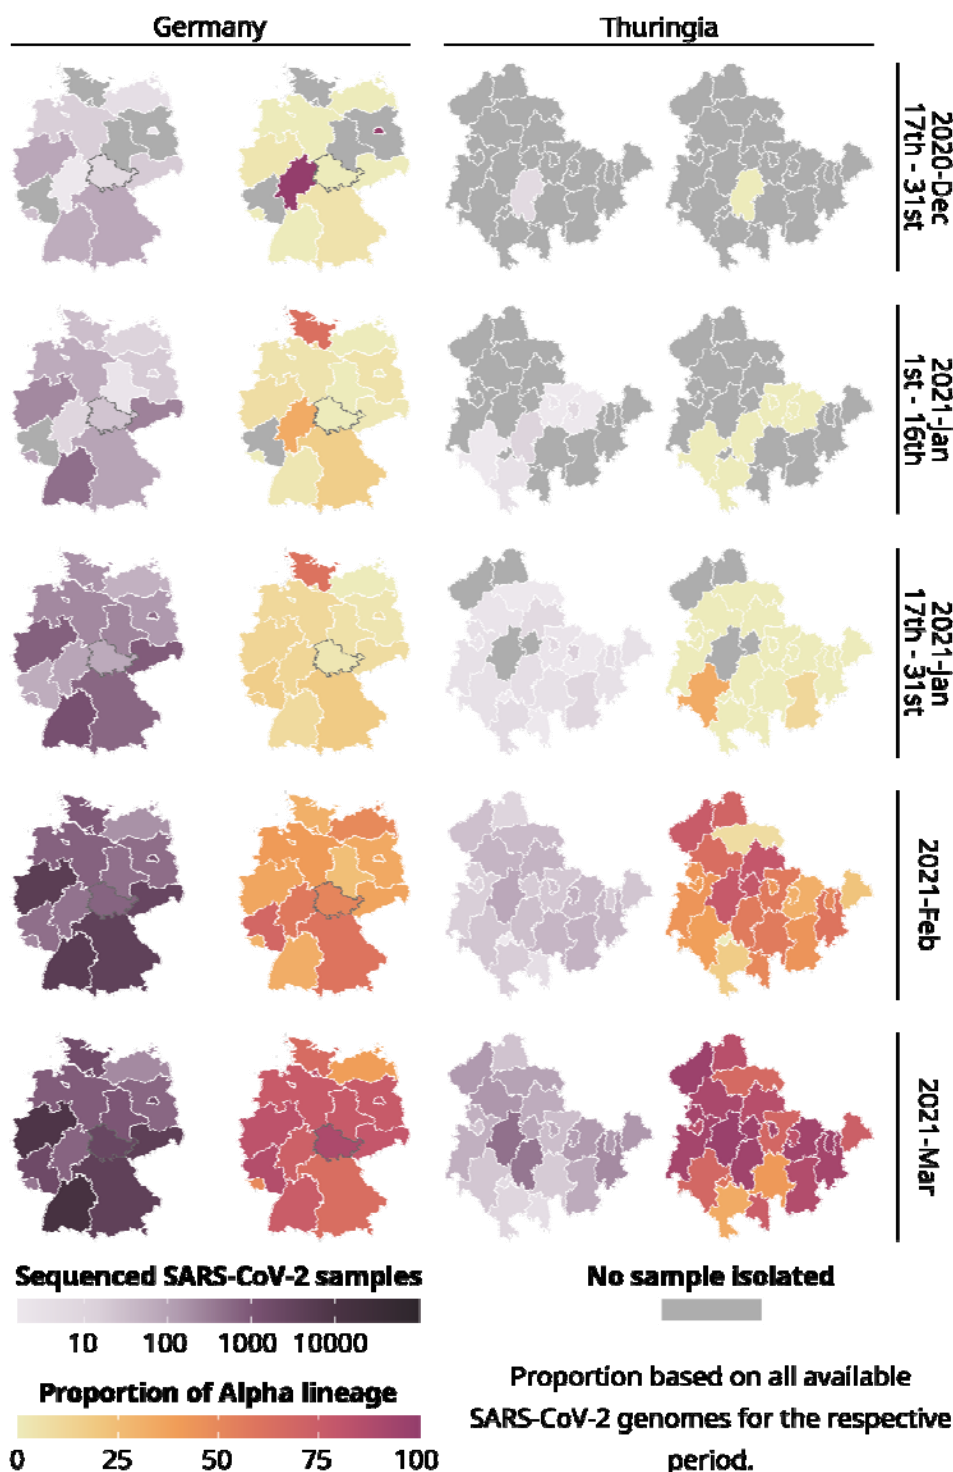

110 **Figure 1: Total number of all sequenced SARS-CoV-2 samples (purple) and the proportion of**  
 111 **the Alpha lineage for all sequenced samples (yellow-red) for each state of Germany and each**  
 112 **district of Thuringia. 289,487 publicly available German SARS-CoV-2 genomes and their metadata**  
 113 **were used for the general German maps, excluding data from Thuringia. For Thuringia, we always**  
 114 **used 7,394 genomes and their metadata from our database for the German and Thuringian maps.**  
 115 **Please note that for all states except Thuringia, we used the postal code of the sending laboratory as**  
 116 **a proxy for the geographic location of a sample. A gray border on the maps of Germany highlights**  
 117 **Thuringia.**  
 118

119 In late December 2020, six federal states in Germany (from here on called states) reported  
120 the first cases of the Alpha variant. Although sequencing was initially low, it gradually  
121 increased in the following month. However, the Corona-Surveillance regulation was passed  
122 at the end of January 2021, leading to a rapid increase in sampling and sequencing by  
123 February since sequencing costs could be reimbursed. Even though Thuringia sequenced a  
124 similar amount of SARS-CoV-2 samples compared to other German states (as shown in  
125 Figure 1), the proportion of the Alpha variant to other lineages was relatively low. However,  
126 the proportion of Alpha increased heavily in February.

127 By March, Alpha had spread to nearly all states and districts (districts are similar to counties  
128 or provinces) in Germany (Median: 76.47 % Alpha samples among a federal states total  
129 sequenced samples compared to 36.03 % in February, excluding Thuringia) and Thuringia  
130 (Median: 85.29 %, up from 50.00 % in February). So, there was no noticeable difference in  
131 the Alpha proportions between Germany and Thuringia after February. During the summer  
132 of June and July 2021, sequencing declined in Germany (including Thuringia;  
133 Supplementary Figure S2) due to the decrease in overall daily cases, as reported by  
134 Meinrup *et al.* and Oh and Hölzer *et al.*<sup>20,21</sup>

135 In summary, the spread of the Alpha lineage in Thuringia lagged roughly two weeks behind  
136 the general spread of other German federal states but showed similar proportions. This  
137 suggests that Thuringia experienced a delay in the initial arrival of Alpha. However, we did  
138 not observe any difference in the overall spread afterward. Thuringia was among the first  
139 states to adopt new containment measures, including contact limitations, closure of retail  
140 shops, and prohibition of tourist journeys (14th December 2020). Jena, a city in Thuringia,  
141 was also the first German city to implement mandatory public masking in March 2020.<sup>22</sup>  
142 Contacts were further restricted on January 9th, and people were urged to restrict their  
143 movement radius to 15 km, which might explain the delay besides the absence of major  
144 airports nearby.

145 All Thuringian genomes were evenly distributed between other German samples in the  
146 phylogenetic time tree (see Supplementary Figure S3). However, due to its rapid spread  
147 from February onwards, it is difficult to accurately track how the Alpha lineage specifically  
148 expanded (point of entries, exact origins, etc.). Consequently, we investigated whether  
149 "sublineages" might be identifiable and trackable to address this.

## 150 Monitoring of Alpha subclusters in Thuringia reveals temporally and 151 regionally restricted distribution patterns

152 To identify possible clusters among the Alpha lineage spreading in Thuringia, we called each  
153 Alpha genome's mutations via Nextclade by analyzing them using poreCov.<sup>7,23</sup> We identified

154 nine clusters out of 70,429 Alpha genomes, based on their mutation profile, time period, and  
 155 phylogenetic distance (from here on called Alpha subclusters; for details, see Methods  
 156 “Subcluster identification”). All subclusters, their time period, and sample size in Thuringia  
 157 are summarized in Table 1. An overview of each subcluster (phylogenetic time tree, location,  
 158 and period) is also provided on [microreact.org](https://microreact.org) as interactive views (see Methods “Subcluster  
 159 identification”). Note that our subcluster definition is similar to the definition of a sublineage.  
 160 However, PANGO sublineages were rarely defined during the Alpha wave (PANGO  
 161 designation: Q.1 to Q.8; compared to the Delta and Omicron waves).

162 **Table 1: Overview of nine Alpha subclusters in Thuringia, their sample count, their time period,**  
 163 **and their specific mutations that are shared across all members of the subcluster (excluding**  
 164 **characteristic Alpha mutations that are shared across all subclusters). The mutation used to**  
 165 **define the subcluster is highlighted in bold.**

| Designation      | Mutations                                         | Number of samples | Time period   | Remarks                                                                                                                                                    |
|------------------|---------------------------------------------------|-------------------|---------------|------------------------------------------------------------------------------------------------------------------------------------------------------------|
| 1                | <b>S:H49Y</b> ,<br>ORF1a:I841V                    | 44                | Feb-May 2021  | S:H49Y eases cell entry in S-pseudotyped lentiviral system. <sup>24</sup>                                                                                  |
| 2                | <b>S:N354K</b>                                    | 63                | Feb-May 2021  | S:N354K slightly impaired mAb h11B11. <sup>25</sup>                                                                                                        |
| 3                | <b>S:G496S</b> ,<br>ORF1a:E1013K                  | 12                | Mar-May 2021  | S:G496S: compromises BA.1 replication fitness and changed mAb sensitivities, reduces ACE2 binding affinity, and increases immune evasion. <sup>26-28</sup> |
| 4                | <b>S:N703D</b> ,<br>ORF1a:D1228G,<br>ORF1a:A2123V | 51                | Mar-May 2021  | -                                                                                                                                                          |
| 5                | <b>S:T716V</b> ,<br>N:G204P,<br>ORF1a:D1600N      | 22                | Apr-May 2021  | -                                                                                                                                                          |
| 6                | <b>S:S939F</b>                                    | 206               | Feb-May 2021  | S:S939F: modulates T-cell propensity. <sup>29</sup>                                                                                                        |
| 6.1 <sup>#</sup> | <b>S:V90F</b> ,<br>S:S939F                        | 55                | Feb-May 2021  | -                                                                                                                                                          |
| 7                | <b>ORF1b:A520V</b>                                | 811               | Feb-Jun 2021* | -                                                                                                                                                          |
| 7.1 <sup>§</sup> | <b>S:N185D</b> ,<br>ORF1b:A520V,<br>ORF1b:L1504F  | 40                | Feb-May 2021  | -                                                                                                                                                          |

166 \* only one sample for June # branch from subcluster 6 § branch from subcluster 7

167 Eight of these subclusters are based around a specific spike protein mutation, while the  
 168 other contains a mutation within the ORF1b region. The subcluster 7.1 “S:N185D” branched  
 169 out from the subcluster 7 “ORF1b:A520V” and subcluster 6.1 “S:V90F” is a branch of  
 170 subcluster 6 “S:S939F” (see Table 1). These two branched subclusters still carry the specific  
 171 mutation of their originating subcluster. The subclusters 3, 4, and 5 were observable

172 between two and three months, and the other subclusters over at least four months. To  
173 investigate these subclusters' regional spread, each sample was mapped to its Thuringian  
174 district based on the resident's postal code from which it was isolated. We then sorted the  
175 samples according to their subclusters and visualized them throughout the subcluster's  
176 observed period. The spread of two representative subclusters is exemplary visualized in  
177 Figure 2a, and all the subclusters are available via Supplementary Figure S4 and their data  
178 in Supplementary Table S3. Additionally, all subclusters and their metadata are also  
179 available via Microreact (see Methods "Subcluster identification").

180

181 Each of the seven main mutation variant clusters originated from a different Thuringian  
182 district. At the same time, two subclusters, 6.1 and 7.1, branched out from the same districts  
183 as their original clusters (6 and 7) 12 or 13 days after their first emergence. The subclusters  
184 mainly spread regionally confined and not across all of Thuringia (see Figure 2a and  
185 Supplementary Figure S4) but were also identified in other states of Germany (see  
186 "microreact.org"-project). For example, the "S:S939F" subcluster spread across 15 states,  
187 with the first samples being isolated outside of Thuringia. The eight Spike-mutation  
188 subclusters had expanded between four to twelve of the 23 Thuringian districts within the  
189 observable time period of each subcluster. They expanded by one to six districts per month,  
190 with a greater expansion accompanied mainly by a larger increase in the subcluster sample  
191 number. In contrast, the ORF1b-variant even comprised 21 districts and expanded between  
192 two to seven districts per month (see Figure 2a). Most of each subcluster's samples were  
193 identified in their region of first occurrence, and no additional samples were found after the  
194 given periods.

195 Several limitations need to be considered. The identified subclusters may have multiple  
196 origins or may not originate from Thuringia. Due to the lack of precise zip codes (publicly  
197 available German genomes are limited to postal codes of sending and sequencing  
198 laboratories), monitoring the subclusters in other states on a district level was impossible.  
199 Nevertheless, we could follow how the subclusters developed in Thuringia, even if multiple  
200 origins may have affected the overall speed or length of each subcluster's occurrence.

201 Our surveillance sampling heavily relies on various institutions and partners, and only a  
202 portion of the provided samples can be sequenced (see "Sampling" in Methods). For  
203 example, the spread of subcluster "S:S939F" revealed two districts in April where no  
204 respective samples were found (Figure 2a) despite being surrounded by districts with  
205 "S:S939F"-samples present. This could be due to the lack of samples sent to sequencing  
206 from those regions or the low prevalence. We, therefore, investigated if mobile service data  
207 of residents, in addition to molecular surveillance, might be utilized to counteract this issue.



208 Mobile service data indicates Alpha subcluster spread and sampling bias

209 With the aim to predict the subcluster spread and, thereby, reduce surveillance-based  
210 sampling bias, we utilized anonymized mobile service data from T-Systems International  
211 GmbH. Around 200 million trips were used to determine the number of daily trips between  
212 the Thuringian districts. We then combined this information with our fine-granular genomic  
213 data to specify each district's monthly proportion of inbound mobility from subcluster-  
214 affiliated districts (see Methods "Mobile service data"). The results are visualized in Figure  
215 2b (complete overview in Supplementary Figure S5; data provided in Supplementary Table  
216 S4).

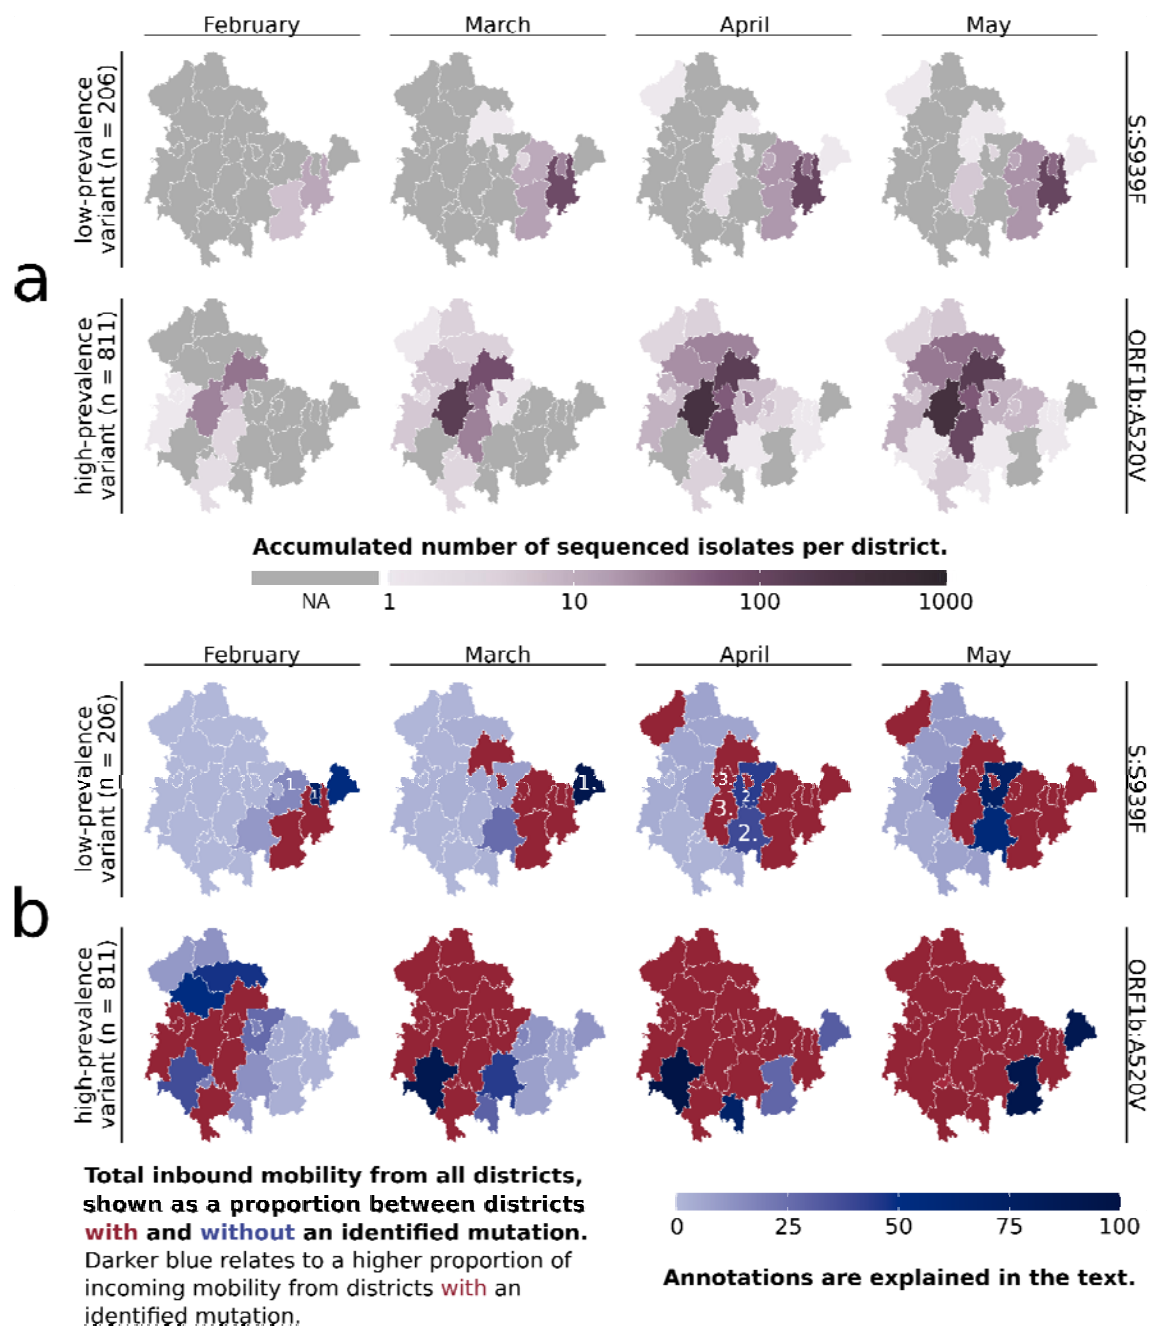

217

218 **Figure 2: Overview of the subclusters "S:S939F" and "ORF1b:A520V" in Thuringian districts.**  
 219 a) Accumulated number of sequenced samples for each subcluster per district and per month. b)  
 220 Combined visualization of each district's "inbound mobility" from other districts (color intensity) and the  
 221 occurrence of a subcluster sample (red = sample found, blue = no sample found). The inbound  
 222 mobility of each district (blue color intensity) is shown as a proportion of incoming mobility from other  
 223 districts with or without an identified sample. The darker the blue color of a district, the higher the  
 224 proportion of inbound mobility from other districts with an identified subcluster sample (red districts).  
 225 The light blue color describes that most of the inbound mobility of a district comes from other districts  
 226 without an identified subcluster sample (blue districts). Numbers refer to district types 1, 2, and 3,  
 227 as further defined in the main text. The last month of subcluster "ORF1b:A520V" is not visualized, as  
 228 affected districts were unchanged.

229 The mobile service data-based prediction of a subcluster's spread aligned well with the  
230 subsequent regional coverage of fast-spreading, highly prevalent subclusters, such as  
231 subcluster 7, which covered 811 samples (see Figure 2). In contrast, the predicted spread  
232 for the low-prevalence subclusters did not correspond well with the actual occurrence. Yet,  
233 adding mobile service data resulted in three different “types” of districts (see Figure 2b,  
234 annotated districts). Type 1 included districts with high inbound mobility from areas with an  
235 identified variant, where the variant was eventually found afterward, while Type 2 included  
236 districts with high inbound mobility from areas with an identified variant, where the variant  
237 was never identified. Type 3 included districts not directly connected to a district with an  
238 identified variant, but a variant was eventually identified while they border Type 2 district(s).  
239 Our previous analysis of the subclusters' spreading pattern across the districts, based solely  
240 on identified variants, indicated missed identifications in some districts due to the seemingly  
241 illogical spread to districts without a connection to others (Figure 2a, subcluster “S:S939F”).  
242 The inclusion of mobile service data revealed some of these districts to be Type 2 districts.  
243 This suggests that the specific variant should be identifiable within these districts due to the  
244 observed high incoming mobility from districts with identified variants. Type 2 districts were  
245 mainly observed for subclusters with low prevalence and, consequently, low numbers of  
246 covered samples that are usually more difficult to monitor. For example, we assumed  
247 missing identifications in some districts of subclusters 1, 2, and 3, which, through the mobile  
248 service data, are now partially identified as Type 2 districts. However, due to their low  
249 prevalence, it is also possible that these subclusters have not spread to the indicated  
250 districts.

251 Despite analyzing the mobile service data of districts from other federal states than  
252 Thuringia, we could not apply them, as the lack of precise location data for samples outside  
253 of Thuringia prevented the correct calculation of the incoming mobility. Based on the nine  
254 observable clusters, we concluded that mobile service data is a good prediction marker for  
255 the spread of high-prevalence variants but, more importantly, a good indication of districts  
256 that should have an identified low-prevalence variant. Next, we investigated if mobile service  
257 data can improve active surveillance via guiding sample collection for genomic sequencing.

## 258 Proof of principle: Mobile service data-guided sampling for genomic 259 surveillance for Omicron BQ.1.1

260 Based on our previous findings, we implemented the “mobility-guided” sampling approach  
261 under real pandemic circumstances over one month in addition to our active surveillance.  
262 As the subject of investigation, we searched for a newly emerging (based on global news  
263 reports) and ideally low prevalent SARS-CoV-2 lineage in Thuringia.

264 Among the various emerging Omicron sublineages during that time, sublineage BQ.1.1  
265 fulfilled the defined criteria. First isolated in a northwestern Thuringian community with  
266 around 20,000 inhabitants on October 5, 2022, we identified this particular sublineage on  
267 October 14, 2022, among a routine batch of 42 samples. BQ.1.1 was a low-prevalence  
268 sublineage that was identified worldwide ([https://outbreak.info/situation-](https://outbreak.info/situation-reports?pango=BQ.1.1)  
269 [reports?pango=BQ.1.1](https://outbreak.info/situation-reports?pango=BQ.1.1)).

270 Following its first Thuringian identification, we utilized the latest available dataset of the past  
271 two years of mobile service data (October 2020 and June 2021) to investigate the residential  
272 movements for the community of first detection. Considering the highest incoming mobility  
273 from both datasets, we identified 18 communities with high (> 10,000), 34 with medium  
274 (2,001-10,000), and 82 with low (30-2,000) number of incoming one-way trips from the  
275 originating community (purple triangles in Figure 3a). As a result, we specifically requested  
276 all the available samples from the eight communities with the highest incoming mobility. Still,  
277 we were restricted to the submission of third parties over whom we had no influence. This  
278 led to the inclusion of the following eight communities with the most residential movement  
279 from the originating community: four in central and three in NW of Thuringia, one in NW-  
280 neighboring state Saxony-Anhalt. The samples requested from central Thuringia were also  
281 due to their geographic arrangement as a “belt” in central Thuringia, linking three major cities  
282 (see Supplementary Figure S1). Subsequently, we collected 19 additional samples (isolated  
283 between the 17th and 25th of October 2022; see “Guided Sampling” for October 2022,  
284 Figure 3a) besides the randomized sampling strategy. Thus, the sampling depth was  
285 increased in communities with high incoming mobility from the first origin.

286 As part of the general Thuringian surveillance, we collected 132 samples for October  
287 (covering dates between the 5th and 31st) and 69 samples in November (covering dates  
288 between the 1st and 25th; see Figure 3b and 3c). Randomized sampling was not influenced  
289 or adjusted based on the mobility-guided sample collection. Thus, it also contains samples  
290 from communities with a mobility link towards the first occurrence of BQ.1.1, as they were  
291 part of the regular random collection (see gray triangles in Figure 3b). A complete overview  
292 of all samples is provided in Supplementary Table S5. The mobility datasets from October  
293 2020 and June 2021 for all sampled communities are provided in Supplementary Table S6.

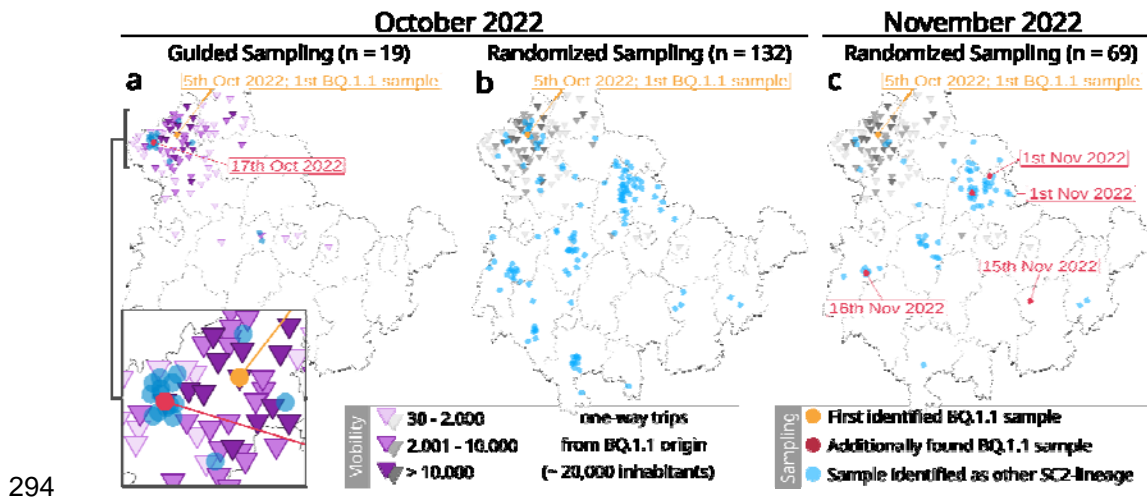

295 **Figure 3: Overview of the mobility-guided sampling of the Omicron sublineage BQ.1.1 in**  
296 **Thuringia (a) compared to the default randomized sampling (surveillance) in October (b) and**  
297 **November 2022 (c).** The randomized surveillance results in November 2022 (c) have been added to  
298 highlight the spreading progress of BQ.1.1. Dots reflect the location of each sample (based on  
299 residents' zip codes). Orange dot: First identified BQ.1.1 sample; Red dot: Additionally identified  
300 BQ.1.1 sample; Blue dot: Another SARS-CoV-2 lineage. Purple triangles represent the number of  
301 one-way trips a community received from the community of the first BQ.1.1 occurrence (orange dot)  
302 based on mobility data from October 2020 and June 2021. The same mobility data from mobility-  
303 guided sampling (a) were added in grayscales to the randomized surveillance (b and c) as a visual  
304 reference only. Sampling dots are slightly scattered to improve visibility.

305 Among the 19 samples specifically collected based on mobile service data, we identified one  
306 additional sample of the specific Omicron sublineage BQ.1.1 in a community with high  
307 incoming mobility (n = 14, number of trips = 37,499) with a distance of approximately 16 km  
308 between both towns. Our randomly sampled routine surveillance strategy did not detect  
309 another sample during the same period. This was despite a seven times higher overall  
310 sample rate, which included 31 samples from communities with an identified incoming  
311 mobility from the community of the first occurrence (October 2022, Figure 3b). Only in the  
312 one-month follow-up were four other samples identified across Thuringia through routine  
313 surveillance (November 2022, Figure 3c).

314 During our attempt to implement the mobility-guided sampling approach in real-time during  
315 the pandemic, we encountered three distinct limitations, some of which are commonly  
316 observed in surveillance practices. The guided sampling depended on the individual sample  
317 submitting institutions, affecting the availability of suitable samples, especially for the  
318 communities of interest. By choosing a newly emerging Omicron sublineage for our  
319 experiment, spread and, therefore, suitability were uncertain. In our case, BQ.1.1's  
320 prevalence in Thuringia was even lower than expected, and it also remained rare in  
321 subsequent months, with only 42 samples found until June 2023, eight months after the first  
322 occurrence in Thuringia. Due to the short preparation time, only mobile service data from the

323 past two years and no current data were available. Nevertheless, the available datasets still  
324 reflect pandemic movement behavior since the pandemic has been ongoing for two years.  
325 In summary, increasing the sampling depth in the suspected regions successfully identified  
326 the specified lineage using only a fraction of the samples from the randomized sampling.  
327 Conversely, randomized surveillance, the “gold standard” acting as our negative control, did  
328 not identify additional samples with similar sampling depths in regions with no or low  
329 incoming mobility or even in high mobility regions with less sampling depth. Implementing  
330 such an approach effectively under pandemic conditions poses difficult challenges due to the  
331 fluctuating sampling sizes. Although the finding of the sample may have been coincidental,  
332 our proof of concept demonstrated how we can leverage the potential of mobile service data  
333 for targeted surveillance sampling.

## 334 Conclusion

335 During the SARS-CoV-2 pandemic, diverse data sources like travel, wastewater, and  
336 mobility data have been employed in surveillance and transmission tracking.<sup>14–19</sup> In the  
337 present study, we analyzed over 296,800 German SARS-CoV-2 genomes to examine  
338 whether mobile service data can predict the spatial distribution of the Alpha lineage in the  
339 German state of Thuringia and how they potentially benefit pandemic surveillance.  
340 A plausible explanation for the delayed spread of the Alpha lineage in Thuringia is the lack of  
341 major transport hubs, as Alpha first occurred in federal states with such hubs. Previous  
342 studies have already highlighted the impact of major transportation hubs in the spread of  
343 Sars-CoV-2<sup>14,30</sup>. However, its impact on the total distribution is limited, and the spread was  
344 ultimately comparable between Germany and Thuringia. While our findings on mobile  
345 service data may also apply to Germany, we could not verify this because the limited  
346 location data of publicly available German genomes prevented in-depth investigations  
347 outside of Thuringia. Thus, precise sampling location data are crucial to utilize mobile  
348 service data in genomic surveillance, but privacy regulations may restrict access to this data.  
349 Shortly after Alpha’s emergence, mutation variants formed like the known sublineages Q.1 to  
350 Q.8 and the Thuringian subclusters identified by us. This reflects the ongoing evolution  
351 during active circulation and indicates an even greater sublineage diversity, which has not  
352 been surveyed as closely as in the subsequent Delta and Omicron waves. By monitoring the  
353 nine Thuringian subclusters, rather than focusing solely on the parental lineage B.1.1.7, we  
354 were again able to effectively track transmissions and gain a comprehensive understanding  
355 of the regional spread. So, it underscores the importance of sequencing in pandemic

356 surveillance to explore such genomic changes and, thereby, keep track of the transmission  
357 chains and potential outbreaks.

358 Mobile service data can support such surveillance in different ways. Previous studies  
359 examined the capabilities of mobility data in the context of, e.g., case trajectories, but  
360 retrospectively applied to already collected data, it can be used to examine surveillance  
361 sampling coverage and possible sampling bias. We exemplified this approach with the Alpha  
362 lineage, where mobile service data indicated a putative sampling bias and partially predicted  
363 the spread of our Thuringian subclusters.

364 Another approach is actively guiding the sampling process through mobile service data,  
365 which we demonstrated with our proof of principle focusing on the Omicron-lineage BQ.1.1  
366 as a real-life example. This approach could allow for a flexible allocation of surveillance  
367 resources, enabling adaptation to specific circumstances and increasing sampling depth in  
368 regions where a variant is anticipated. By incorporating guided sampling, much fewer  
369 resources may be needed for unguided or random sampling, thereby reducing overall  
370 surveillance costs.

371 Additionally, while this approach is particularly useful for identifying low-prevalence variants,  
372 it is not limited to such variants. Still, it can provide a guided, more cost-efficient, low-  
373 sampling alternative to general randomized surveillance that can also be applied to other  
374 viruses or lineages. For this purpose, Pre-generated mobility networks automatically tailored  
375 to each state's unique infrastructure and population dynamics could provide better-targeted  
376 sampling guidance rather than simple geographical proximity. However, the feasibility  
377 depends on the availability and cost of such mobile service data. Alternatively, financial  
378 resources could also be invested directly in increasing sampling capacity and coverage,  
379 which ultimately depends on individual factors of the respective surveillance. Mobile service  
380 data can also be used with other surveillance approaches and elements. For example,  
381 wastewater surveillance can give further indications to supplement guided sampling. At the  
382 same time, passenger data offers additional insights into traffic hubs as sources of regional  
383 movement.

## 384 Methods

### 385 Sampling

386 Starting mid-2020, we initially sequenced hospital-intern samples, transitioning by January  
387 2021 to approximately 43 PCR-positive samples per week: 20 from the hospital's

388 microbiology department and 23 randomly sourced by the Thuringian State Authority for  
389 Consumer Protection (“Thüringer Landesamt für Verbraucherschutz”; TLV).  
390 Until June 2023, our institute sequenced 3,770 SARS-CoV-2 samples, and SYNLAB Holding  
391 Deutschland GmbH, Bioscientia Healthcare GmbH, and DIANOVIS GmbH provided  
392 additional 7,800 Thuringian SARS-CoV-2 genomes and their metadata.

### 393 Sample preparation and sequencing

394 RNA isolation used the ZymoResearch “Quick-RNA Viral Kit” (Zymo Research Europe  
395 GmbH, Germany, Product-ID: R1035), according to the manufacturer's instructions with  
396 100 µl patient sample input and a centrifuge speed of 16,000 g.

397 The viral RNA underwent a Reverse Transcriptase (RT)-PCR followed by a multiplex-PCR  
398 using the ARTIC V1200 primer set, according to Freed and Silander's SARS-CoV-2  
399 sequencing protocol (version 4, updating to version 5 by March 2021).<sup>31</sup> Subsequent DNA  
400 quantification utilized the Qubit dsDNA HS assay (Invitrogen, USA).

401 From the amplified DNA, a sequencing library was prepared using the Nanopore SQK-  
402 LSK109 and SQK-RBK004 kits (Oxford Nanopore Technologies, Oxford, UK), sequenced for  
403 a maximum of 72 h utilizing an Oxford Nanopore MinION Mk1b sequencer with R.9-flowcells  
404 and the MinKNOW software (versions MKE\_1013\_v1\_revBC\_11Apr2016 to  
405 MKE\_1013\_v1\_revBR\_11Apr2016 in the respective period), and analyzed with the software  
406 pipeline poreCov (versions 0.3.5 to 0.11.7; including basecalling, demultiplexing, adapter  
407 removal, quality filtering, and genome alignment) to reconstruct consensus genomes.<sup>7</sup>

408 Sequencing data and the respective metadata (e.g., isolation date, sending laboratory  
409 details) were submitted to the RKI through DESH. We also collected the postal code of the  
410 isolation location or at least of the sending local health authority, storing all data additionally  
411 in a local database.<sup>32</sup> Due to data protection, such data is limited on the RKI's public GitHub  
412 repository ([https://github.com/robert-koch-institut/SARS-CoV-2-](https://github.com/robert-koch-institut/SARS-CoV-2-Sequenzdaten_aus_Deutschland)  
413 [Sequenzdaten aus Deutschland](https://github.com/robert-koch-institut/SARS-CoV-2-Sequenzdaten_aus_Deutschland)), providing instead postal codes of the sequencing and  
414 sending laboratories.

### 415 Alpha spread datasets

416 From our local database, we extracted 8,397 samples with isolation dates before Oct 1st,  
417 2021. After adding federal state and district information, 993 entries with non-Thuringian  
418 locations were excluded. Further, ten entries with unspecific isolation dates were excluded,  
419 yielding 7,394 samples (including 6,307 Alpha genomes (lineages B.1.1.7 and Q.1 to Q.8)).  
420 The publicly available RKI SARS-CoV-2 dataset was downloaded, containing 1,091,655  
421 genomes with the respective metadata (17th Oct 2022; Zenodo-version 2022-10-16).<sup>33</sup>



422 789,405 entries, isolated after Sep'21, and 59 entries without “sending laboratory”  
423 information were removed. For the resulting 302,191 entries, location information (location,  
424 federal state, district, longitude, latitude) were added based on the sending laboratory postal  
425 code. Five entries with a non-existing postal code and all 12,704 Thuringian samples were  
426 removed from the dataset, resulting in 289,487 samples (including 137,024 Alpha genomes).  
427 We investigated only Alpha-lineage samples collected from September 2020 onwards, after  
428 the first official reports of the Alpha-lineage.<sup>11</sup>  
429 Analyzing both datasets, we calculated the monthly proportion of Alpha lineage samples in  
430 Thuringia and Germany per state/district, dividing Dec'20 and Jan'21 into first and second  
431 halves.

### 432 Subcluster identification

433 Using a total of 70,429 German and Thuringian Alpha genomes, a phylogenetic time tree  
434 was created (see Supplementary Method “Phylogenetic time tree construction” and  
435 Supplementary Figure S3). We determined the frequency of all non-Alpha-specific mutations  
436 among the 6,522 Thuringian Alpha genomes. We then manually screened for mutations  
437 present in at least 20 genomes with a small phylogenetic distance and a time occurrence of  
438 at least two months. This led to nine mutations, each of them creating a defined cluster  
439 covering between 12 and 811 closely related genomes. We only kept mutation information of  
440 these nine subclusters in the respective metadata, which, together with the tree file of the  
441 phylogenetic time tree, was uploaded to a “microreact.org”-project, provided as  
442 Supplementary File 1 and found under the following link:  
443 <https://microreact.org/project/ftR2GfjF6iXtSwbmN4ARTx-thuringianalpha-linclusters#76ir->  
444 [complete-overview](https://microreact.org/project/ftR2GfjF6iXtSwbmN4ARTx-thuringianalpha-linclusters#76ir-complete-overview).

### 445 Mobile service data

446 T-Systems International GmbH collected and aggregated mobile service data via the Cell ID  
447 method, dividing a geographical area into so-called traffic cells. Each cell is assigned to  
448 exactly one transmitter mast, with a spatial resolution from 500 m x 500 m up to 8 km x 8 km  
449 (depending on the transmitter mast network density). Cell phones always register to the  
450 closest traffic cell, which is recorded and stored in an Origin-Destination Matrix (ODM). For  
451 population representation, the data was extrapolated with Deutsche Telekom's market  
452 share. Due to data privacy, the registration data is combined into movement streams  
453 between traffic cells, the status resolution is reduced to one hour (greater time intervals =  
454 less resolution), and individual traffic cells are grouped into districts. The degree of  
455 anonymization (k-value = 30, data privacy regulation) removed movement streams with less

456 than 30 participants, resulting in approximately 200 Mio trips in the ODM. SMA Development  
457 GmbH analyzed all movements between the single Thuringian districts, adding each Alpha  
458 sample's isolation time and location data (per subcluster). The movements were further  
459 divided by months and originating district (subcluster-affiliated vs. -unaffiliated), determining  
460 each district's monthly inbound mobility proportion from cluster-affiliated districts.

## 461 Research in Context

### 462 Evidence before this study

463 We searched Pubmed for studies about the use of mobile service data for surveillance  
464 written in English. For the broadest possible search, we included any publication covering  
465 mobile data and surveillance aspects, using the following search string: ("cellular data" OR  
466 "cell phone data" OR "mobility data" OR "movement data" OR "migration data" OR "phone  
467 data") AND ("Surveillance" OR "Monitoring" OR "Survey" OR "Pandemic" OR "Disease" OR  
468 "Epidemic" OR "Outbreak"). Our search yielded 1,285 publications published between 1966  
469 and 2023. We manually screened all these publications but found no study that applied  
470 mobile service data for active, targeted surveillance. Across all studies, the general focus  
471 was on tracking contacts or analyzing movements to assess, for instance, the efficiency of  
472 non-pharmaceutical interventions or generate prediction models. Some studies suggested  
473 targeted surveillance based on their results, but it was not yet applied. Additionally, we used  
474 "suite.ai" and "chatGPT" (with BING-search access) to let them search for "studies that  
475 utilize mobile service data to guide the sampling process for infectious disease surveillance".  
476 While "suite.ai" found two studies and "chatGPT" found another ten studies and reviews,  
477 none covered the direct application of the mobility data in active surveillance.

### 478 Added value of this study

479 This study highlights the value of combining mobile service data with fine-granular metadata  
480 for integrated genomic surveillance during the SARS-CoV-2 pandemic in a German federal  
481 state. We illustrated this strategy with the Omicron sublineage BQ.1.1 and how to guide the  
482 sampling processes toward areas where the new variant was expected to emerge.  
483 Additionally, we used mobile service data during the pandemic to assess our sampling  
484 coverage. Our study is the first to actively guide part of the genomic surveillance process  
485 during a pandemic.

## 486 Implications of all the available evidence

487 Efficient molecular surveillance setups are crucial in managing outbreaks from the local to  
488 the global scale. Different data sources are investigated to increase this efficiency,  
489 addressing factors like the more efficient usage of scarce surveillance resources and the  
490 prediction of spread. Extending molecular surveillance with such data should improve the  
491 future management of pandemics and outbreaks.

## 492 Author contributions

493 Sample collection and preparation, R.Sp, R.Sc., M.L., and M.M.; sequencing, R.Sp., M.L.,  
494 and M.M.; database setup and maintenance, M.J.; software, C.B.; bioinformatic analysis,  
495 R.Sp., M.L., M.M, and C.B.; mobile service data analysis, C.H., and M.Ha.; literature  
496 research, R.Sp.; writing first draft, R.Sp.; reviewing and editing manuscript, R.Sp., C.B.,  
497 M.M., C.F.-S., A.K., C.H., M.Ha., M.Hö., D.K., R.Sc., P.D., and M.W.P.; supervision, C.B.;  
498 project administration, C.B.; funding acquisition, M.W.P.. All authors have read and agreed  
499 to the published version of the manuscript.

## 500 Funding

501 This work was supported by grants from the Federal Ministry of Education and Research  
502 (project “SARS-CoV-2Dx“), [grant number 13N15745] and the Thüringer Aufbaubank  
503 (project “Pandemie Analyse mittels Advanced Analytics Methoden“), [grant number 2021  
504 VF 0035]. We acknowledge support by the German Research Foundation Projekt-Nr.  
505 512648189 and the Open Access Publication Fund of the Thueringer Universitaets- und  
506 Landesbibliothek Jena.

## 507 Conflicts of interest

508 The authors have declared that no competing interests exist.

## 509 Data sharing statement

510 All genomic data (genomes and respective metadata) are available in the provided microreact  
511 project (project file available under <https://osf.io/n5qj6/>;  
512 [https://microreact.org/project/ftR2GfjF6iXtSwbmN4ARTx-thuringianalpha-linclusters#76ir-](https://microreact.org/project/ftR2GfjF6iXtSwbmN4ARTx-thuringianalpha-linclusters#76ir-complete-overview)  
513 complete-overview). Supplementary tables and the R-scripts used to generate all figures are

514 also provided in the repository under <https://osf.io/n5qj6/>. These include the mobile service  
515 data used in this study, which is available in processed and anonymized form. The original  
516 mobile service data can not be made public due to legal reasons/ownership.

## 517 Declaration of generative AI and AI-assisted technologies in the 518 writing process

519 During the preparation of this work, the author(s) used Grammarly in order to correct general  
520 English and improve readability. After using this tool/service, the author(s) reviewed and  
521 edited the content as needed and take(s) full responsibility for the content of the publication.

## 522 References

- 523 1 Zhu N, Zhang D, Wang W, *et al.* A Novel Coronavirus from Patients with Pneumonia in  
524 China, 2019. *N Engl J Med* 2020; **382**: 727–33.
- 525 2 An integrated national scale SARS-CoV-2 genomic surveillance network. *Lancet Microbe*  
526 2020; **1**: e99–100.
- 527 3 German ‘Corona-Surveillanceverordnung’ as issued on the 18th of January 2021 and  
528 updated on the 27th of June 2022.  
529 [https://www.bundesgesundheitsministerium.de/fileadmin/Dateien/3\\_Downloads/C/Corona](https://www.bundesgesundheitsministerium.de/fileadmin/Dateien/3_Downloads/C/Corona_virus/Verordnungen/CorSurV_BAnz_AT_19.01.2021_V2.pdf)  
530 [virus/Verordnungen/CorSurV\\_BAnz\\_AT\\_19.01.2021\\_V2.pdf](https://www.bundesanzeiger.de/pub/publication/hEG1y5vUCsSa43vJZSP/content/hEG1y5vUCsSa43vJZSP/BAnz%20AT%2028.06.2022%20V1.pdf?inline);  
531 [https://www.bundesanzeiger.de/pub/publication/hEG1y5vUCsSa43vJZSP/content/hEG1y](https://www.bundesanzeiger.de/pub/publication/hEG1y5vUCsSa43vJZSP/content/hEG1y5vUCsSa43vJZSP/BAnz%20AT%2028.06.2022%20V1.pdf?inline)  
532 [5vUCsSa43vJZSP/BAnz%20AT%2028.06.2022%20V1.pdf?inline](https://www.bundesanzeiger.de/pub/publication/hEG1y5vUCsSa43vJZSP/content/hEG1y5vUCsSa43vJZSP/BAnz%20AT%2028.06.2022%20V1.pdf?inline).
- 533 4 Meredith LW, Hamilton WL, Warne B, *et al.* Rapid implementation of SARS-CoV-2  
534 sequencing to investigate cases of health-care associated COVID-19: a prospective  
535 genomic surveillance study. *Lancet Infect Dis* 2020; **20**: 1263–71.
- 536 5 Page AJ, Mather AE, Le-Viet T, *et al.* Large-scale sequencing of SARS-CoV-2 genomes  
537 from one region allows detailed epidemiology and enables local outbreak management.  
538 *Microb Genomics* 2021; **7**. DOI:10.1099/mgen.0.000589.
- 539 6 Lambrou AS, Shirk P, Steele MK, *et al.* Genomic Surveillance for SARS-CoV-2 Variants:  
540 Predominance of the Delta (B.1.617.2) and Omicron (B.1.1.529) Variants — United  
541 States, June 2021–January 2022. *MMWR Morb Mortal Wkly Rep* 2022; **71**: 206–11.
- 542 7 Brandt C, Krautwurst S, Spott R, *et al.* poreCov-An Easy to Use, Fast, and Robust  
543 Workflow for SARS-CoV-2 Genome Reconstruction via Nanopore Sequencing. *Front*  
544 *Genet* 2021; **12**: 711437.
- 545 8 Lataretu M, Drechsel O, Kmiecinski R, Trappe K, Hölzer M, Fuchs S. Lessons learned:  
546 overcoming common challenges in reconstructing the SARS-CoV-2 genome from short-  
547 read sequencing data via CoVpipe2. *F1000Research* 2023; **12**: 1091.
- 548 9 Rambaut A, Holmes EC, O’Toole Á, *et al.* A dynamic nomenclature proposal for SARS-  
549 CoV-2 lineages to assist genomic epidemiology. *Nat Microbiol* 2020; **5**: 1403–7.
- 550 10 PANGO SARS-CoV-2 lineage overview; accessed 18th August 2023.  
551 [https://github.com/cov-lineages/lineages-website/blob/master/\\_data/lineage\\_data.full.json](https://github.com/cov-lineages/lineages-website/blob/master/_data/lineage_data.full.json).
- 552 11 Washington NL, Gangavarapu K, Zeller M, *et al.* Emergence and rapid transmission of  
553 SARS-CoV-2 B.1.1.7 in the United States. *Cell* 2021; **184**: 2587-2594.e7.
- 554 12 Walker AS, Vihta K-D, Gethings O, *et al.* Tracking the Emergence of SARS-CoV-2 Alpha  
555 Variant in the United Kingdom. *N Engl J Med* 2021; **385**: 2582–5.
- 556 13 Michaelsen TY, Bennedbæk M, Christiansen LE, *et al.* Introduction and transmission of  
557 SARS-CoV-2 lineage B.1.1.7, Alpha variant, in Denmark. *Genome Med* 2022; **14**: 47.

- 558 14 Alpert T, Brito AF, Lasek-Nesselquist E, *et al.* Early introductions and transmission of  
559 SARS-CoV-2 variant B.1.1.7 in the United States. *Cell* 2021; **184**: 2595-2604.e13.
- 560 15 O'Toole Á, Hill V, Pybus OG, *et al.* Tracking the international spread of SARS-CoV-2  
561 lineages B.1.1.7 and B.1.351/501Y-V2 with grinch. *Wellcome Open Res* 2021; **6**: 121.
- 562 16 Li J, Ahmed W, Metcalfe S, *et al.* Monitoring of SARS-CoV-2 in sewersheds with low  
563 COVID-19 cases using a passive sampling technique. *Water Res* 2022; **218**: 118481.
- 564 17 Kraemer MUG, Hill V, Ruis C, *et al.* Spatiotemporal invasion dynamics of SARS-CoV-2  
565 lineage B.1.1.7 emergence. *Science* 2021; **373**: 889–95.
- 566 18 Chang S, Pierson E, Koh PW, *et al.* Mobility network models of COVID-19 explain  
567 inequities and inform reopening. *Nature* 2021; **589**: 82–7.
- 568 19 Schlosser F, Maier BF, Jack O, Hinrichs D, Zachariae A, Brockmann D. COVID-19  
569 lockdown induces disease-mitigating structural changes in mobility networks. *Proc Natl*  
570 *Acad Sci* 2020; **117**: 32883–90.
- 571 20 Meintrup D, Nowak-Machen M, Borgmann S. A Comparison of Germany and the United  
572 Kingdom Indicates That More SARS-CoV-2 Circulation and Less Restrictions in the Warm  
573 Season Might Reduce Overall COVID-19 Burden. *Life* 2022; **12**: 953.
- 574 21 Oh DY, Hölzer M, Paraskevopoulou S, *et al.* Advancing Precision Vaccinology by  
575 Molecular and Genomic Surveillance of Severe Acute Respiratory Syndrome Coronavirus  
576 2 in Germany, 2021. *Clin Infect Dis* 2022; **75**: S110–20.
- 577 22 Pletz MW, Steiner A, Kesselmeier M, *et al.* Introduction of mandatory masking in health  
578 care and community: experience from Jena, Germany. *Infection* 2023; published online  
579 April 3. DOI:10.1007/s15010-023-02015-w.
- 580 23 Aksamentov I, Roemer C, Hodcroft E, Neher R. Nextclade: clade assignment, mutation  
581 calling and quality control for viral genomes. *J Open Source Softw* 2021; **6**: 3773.
- 582 24 Ozono S, Zhang Y, Ode H, *et al.* SARS-CoV-2 D614G spike mutation increases entry  
583 efficiency with enhanced ACE2-binding affinity. *Nat Commun* 2021; **12**: 848.
- 584 25 Du Y, Shi R, Zhang Y, *et al.* A broadly neutralizing humanized ACE2-targeting antibody  
585 against SARS-CoV-2 variants. *Nat Commun* 2021; **12**: 5000.
- 586 26 Liang R, Ye Z-W, Ong CP, *et al.* The spike receptor-binding motif G496S substitution  
587 determines the replication fitness of SARS-CoV-2 Omicron sublineage. *Emerg Microbes*  
588 *Infect* 2022; **11**: 2093–101.
- 589 27 Kimura I, Yamasoba D, Nasser H, *et al.* The SARS-CoV-2 spike S375F mutation  
590 characterizes the Omicron BA.1 variant. *iScience* 2022; **25**: 105720.
- 591 28 Asif A, Ilyas I, Abdullah M, Sarfraz S, Mustafa M, Mahmood A. The Comparison of  
592 Mutational Progression in SARS-CoV-2: A Short Updated Overview. *J Mol Pathol* 2022; **3**:  
593 201–18.
- 594 29 Donzelli S, Spinella F, di Domenico EG, *et al.* Evidence of a SARS-CoV-2 double Spike  
595 mutation D614G/S939F potentially affecting immune response of infected subjects.  
596 *Comput Struct Biotechnol J* 2022; **20**: 733–44.
- 597 30 Tegally H, Wilkinson E, Tsui JL-H, *et al.* Dispersal patterns and influence of air travel  
598 during the global expansion of SARS-CoV-2 variants of concern. *Cell* 2023; **186**: 3277-  
599 3290.e16.
- 600 31 Freed N, Silander O. SARS-CoV2 genome sequencing protocol (1200bp amplicon  
601 &#34;midnight&#34; primer set, using Nanopore Rapid kit) v5. 2021  
602 DOI:10.17504/protocols.io.btsrmd6.
- 603 32 Jundzill M, Spott R, Lohde M, Hölzer M, Viehweger A, Brandt C. Managing and  
604 monitoring a pandemic: showcasing a practical approach for the genomic surveillance of  
605 SARS-CoV-2. *Database* 2023; **2023**: baad071.
- 606 33 Koch-Institut R. SARS-CoV-2 Sequenzdaten aus Deutschland. 2022; published online  
607 Oct 16. DOI:10.5281/ZENODO.7212725.

Germany

Thuringia

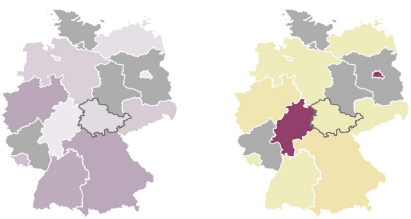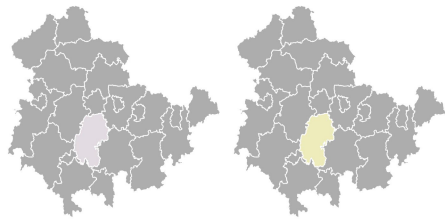

2020-Dec  
17th - 31st

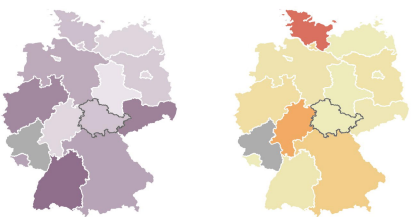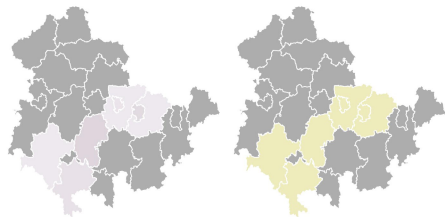

2021-Jan  
1st - 16th

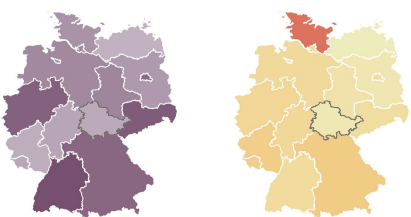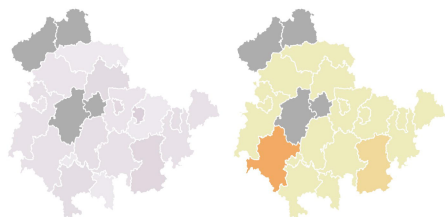

2021-Jan  
17th - 31st

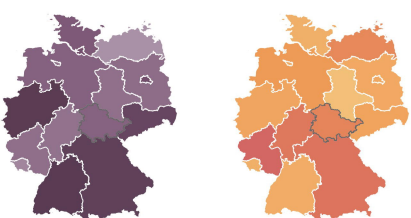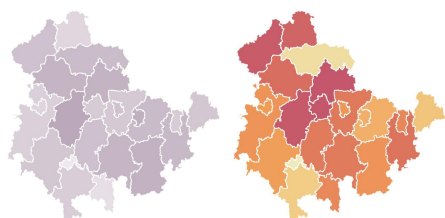

2021-Feb

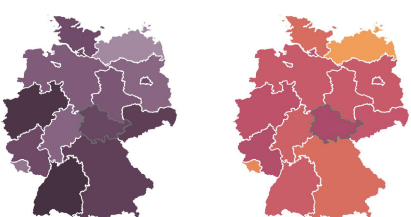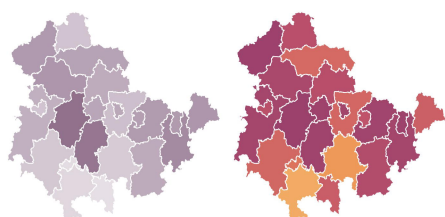

2021-Mar

Sequenced SARS-CoV-2 samples

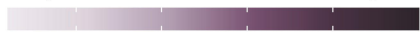

10 100 1000 10000

Proportion of Alpha lineage

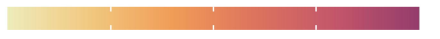

0 25 50 75 100

No sample isolated

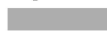

Proportion based on all available SARS-CoV-2 genomes for the respective period.

**a**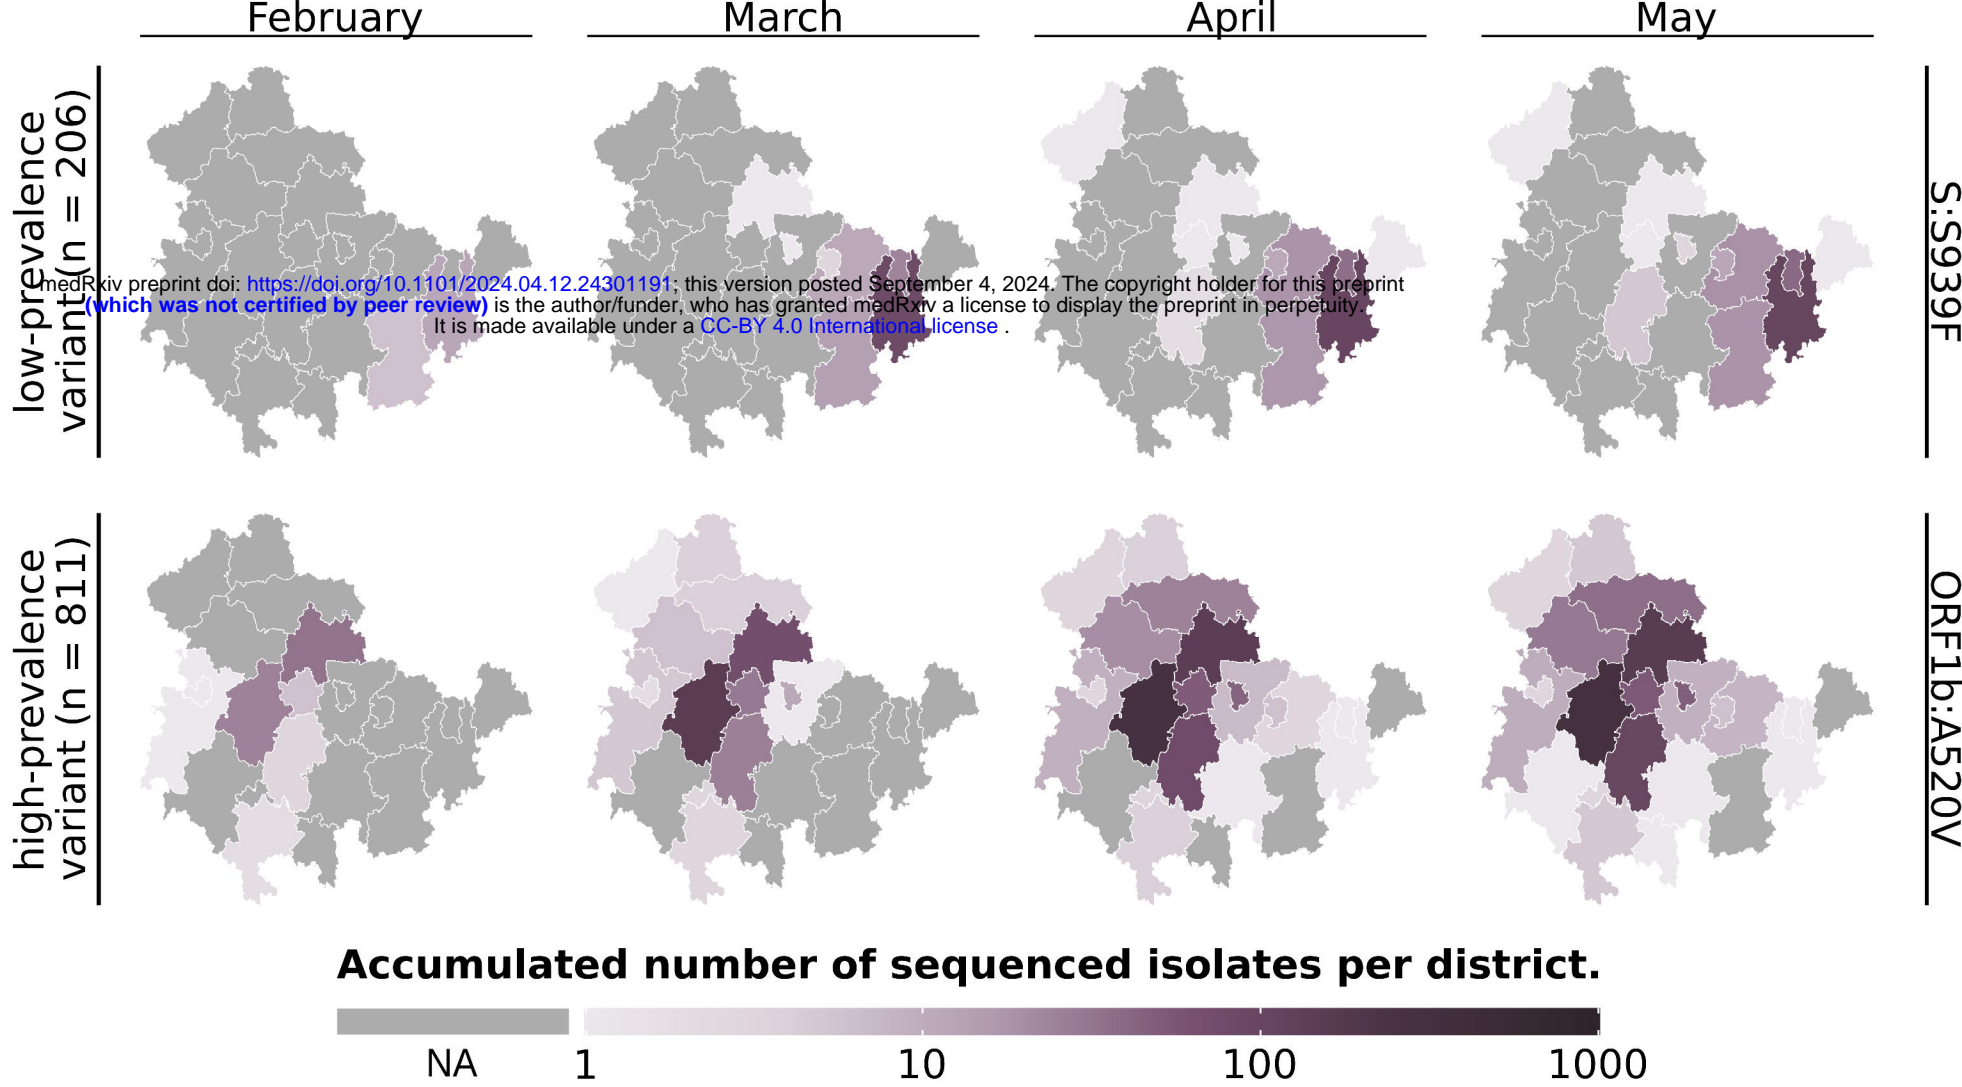**b**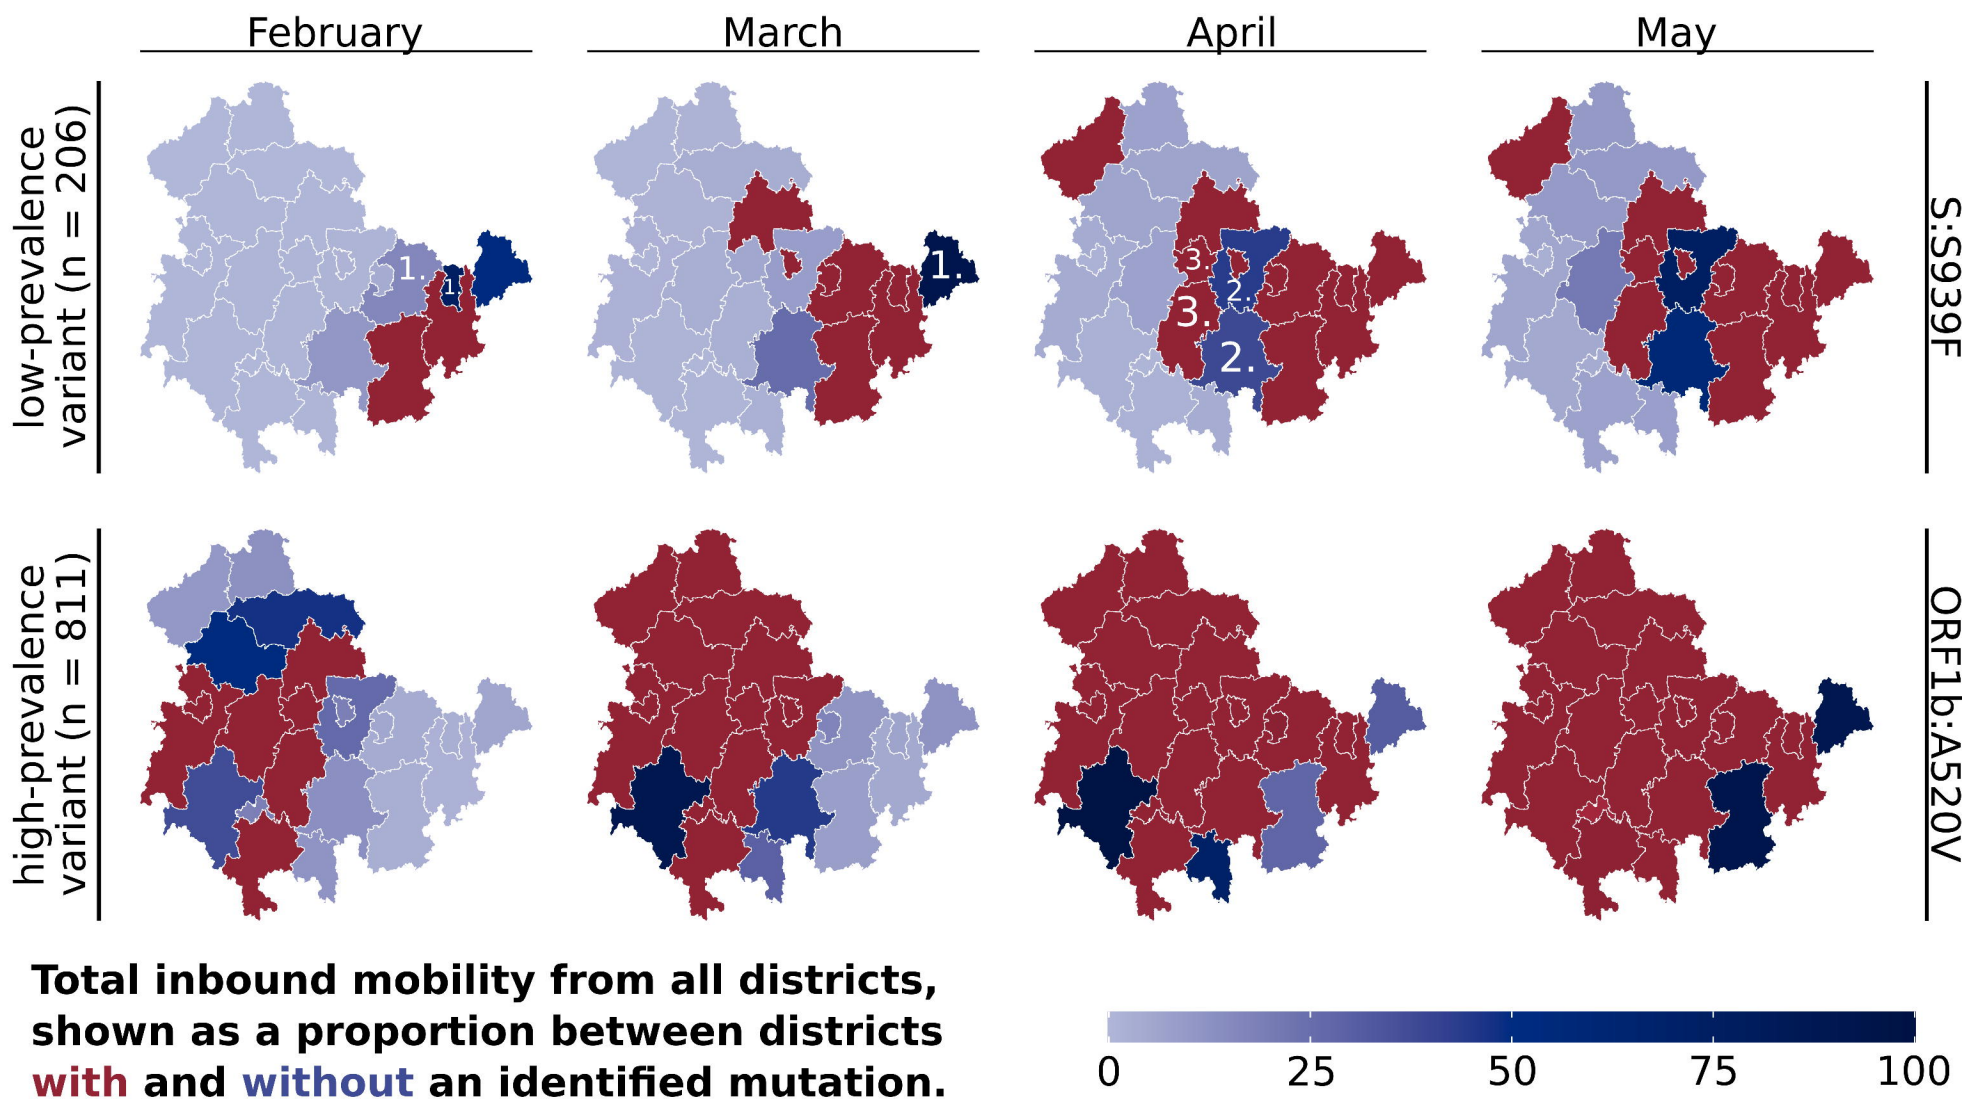**Annotations are explained in the text.**

## Guided Sampling (n = 19)

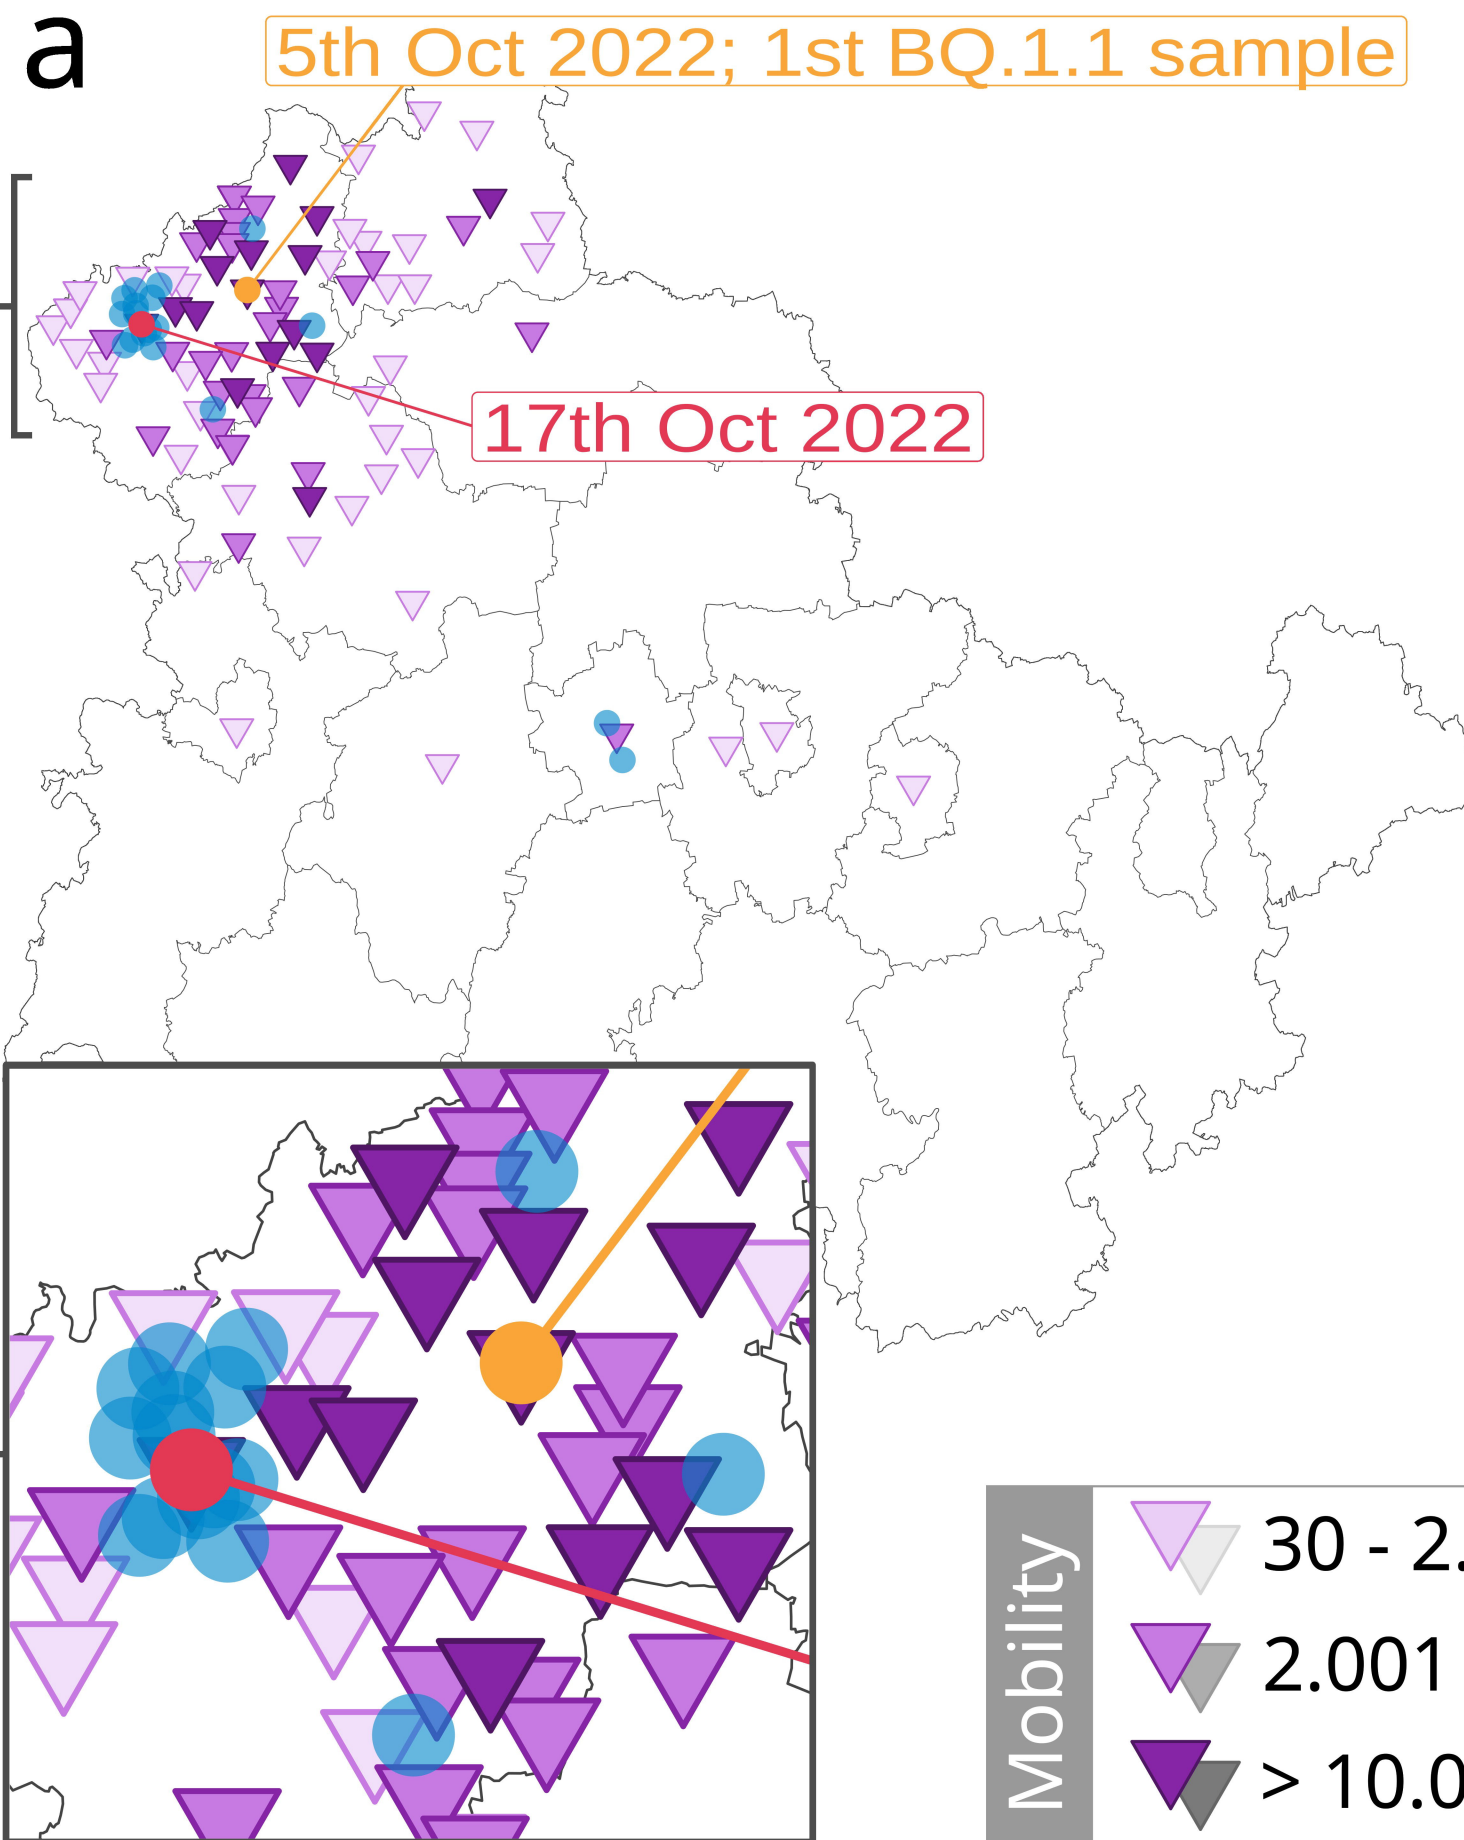

## Randomized Sampling (n = 132)

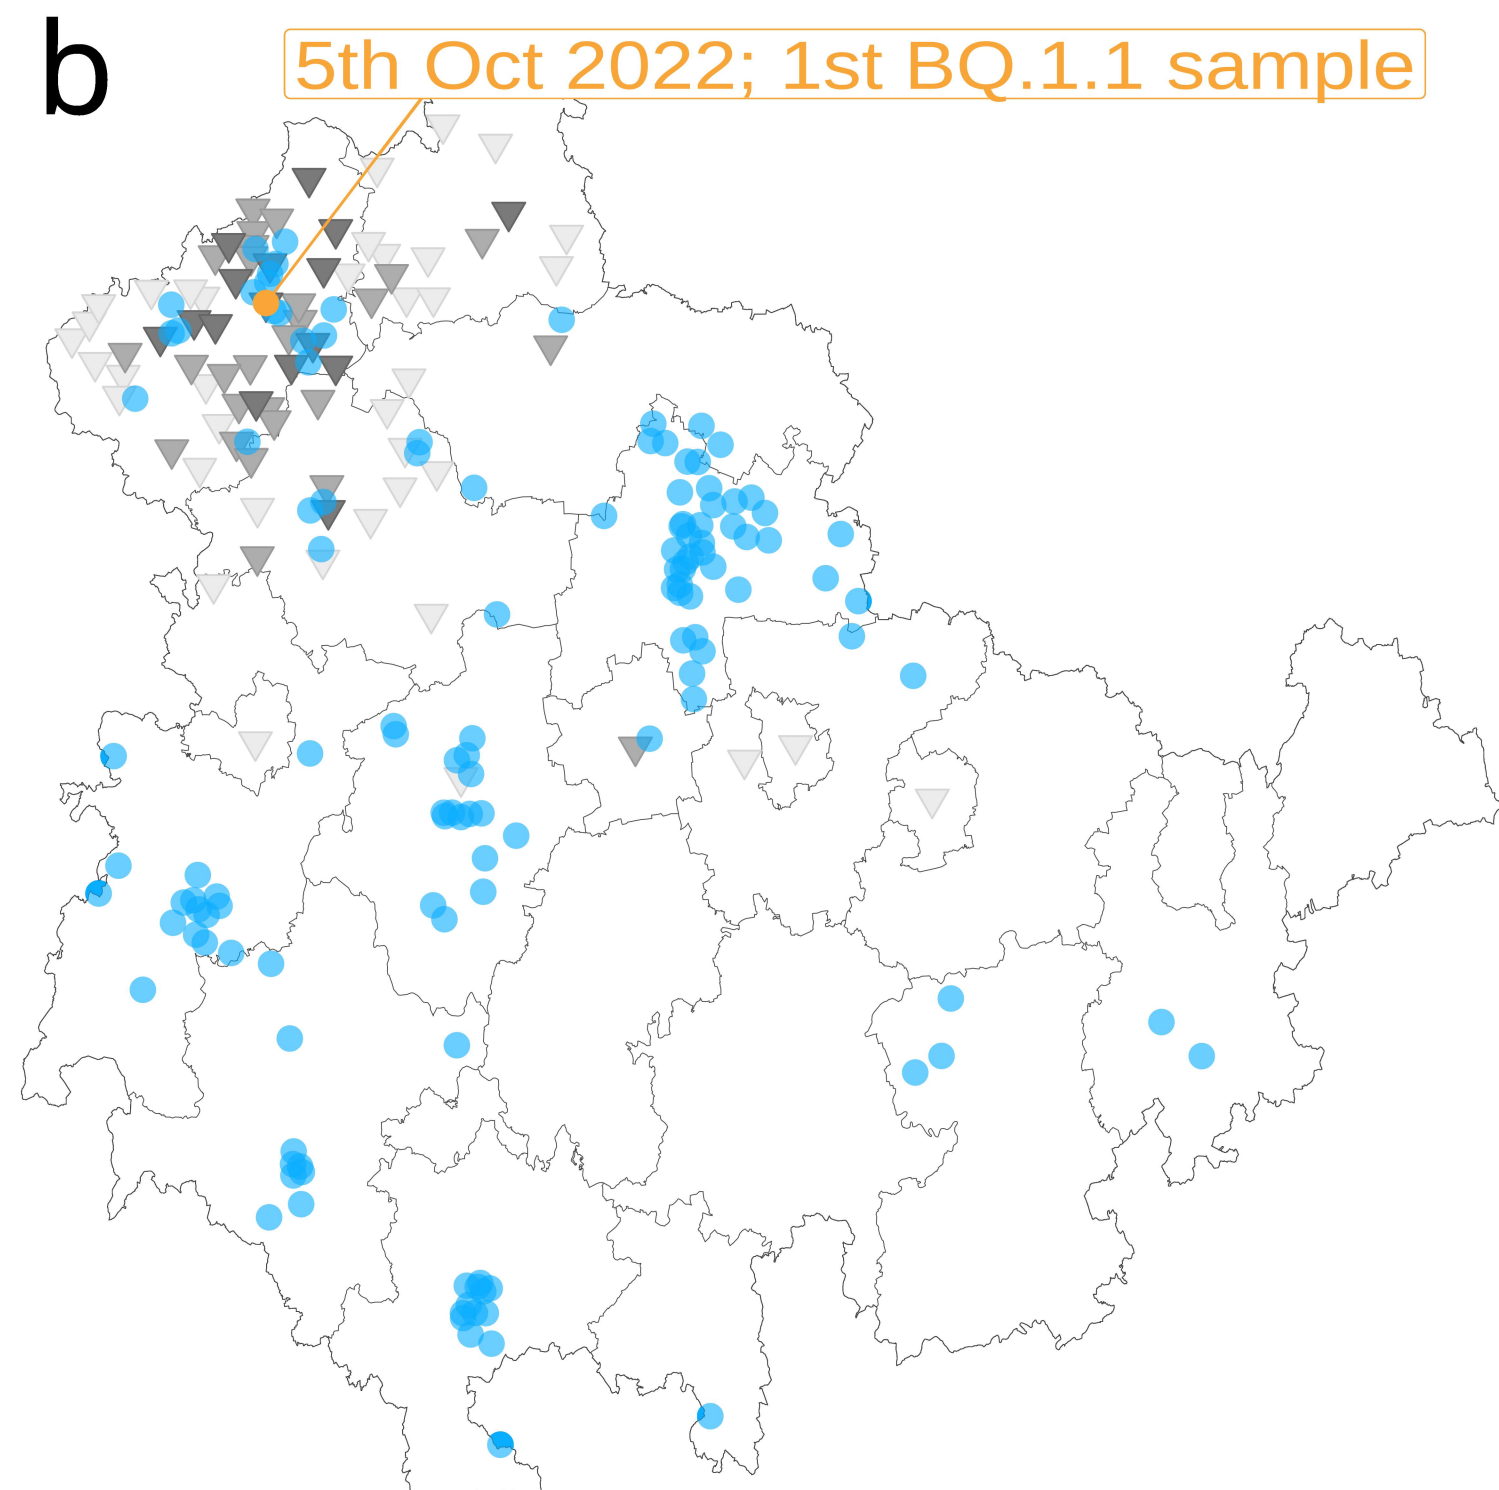

## Randomized Sampling (n = 69)

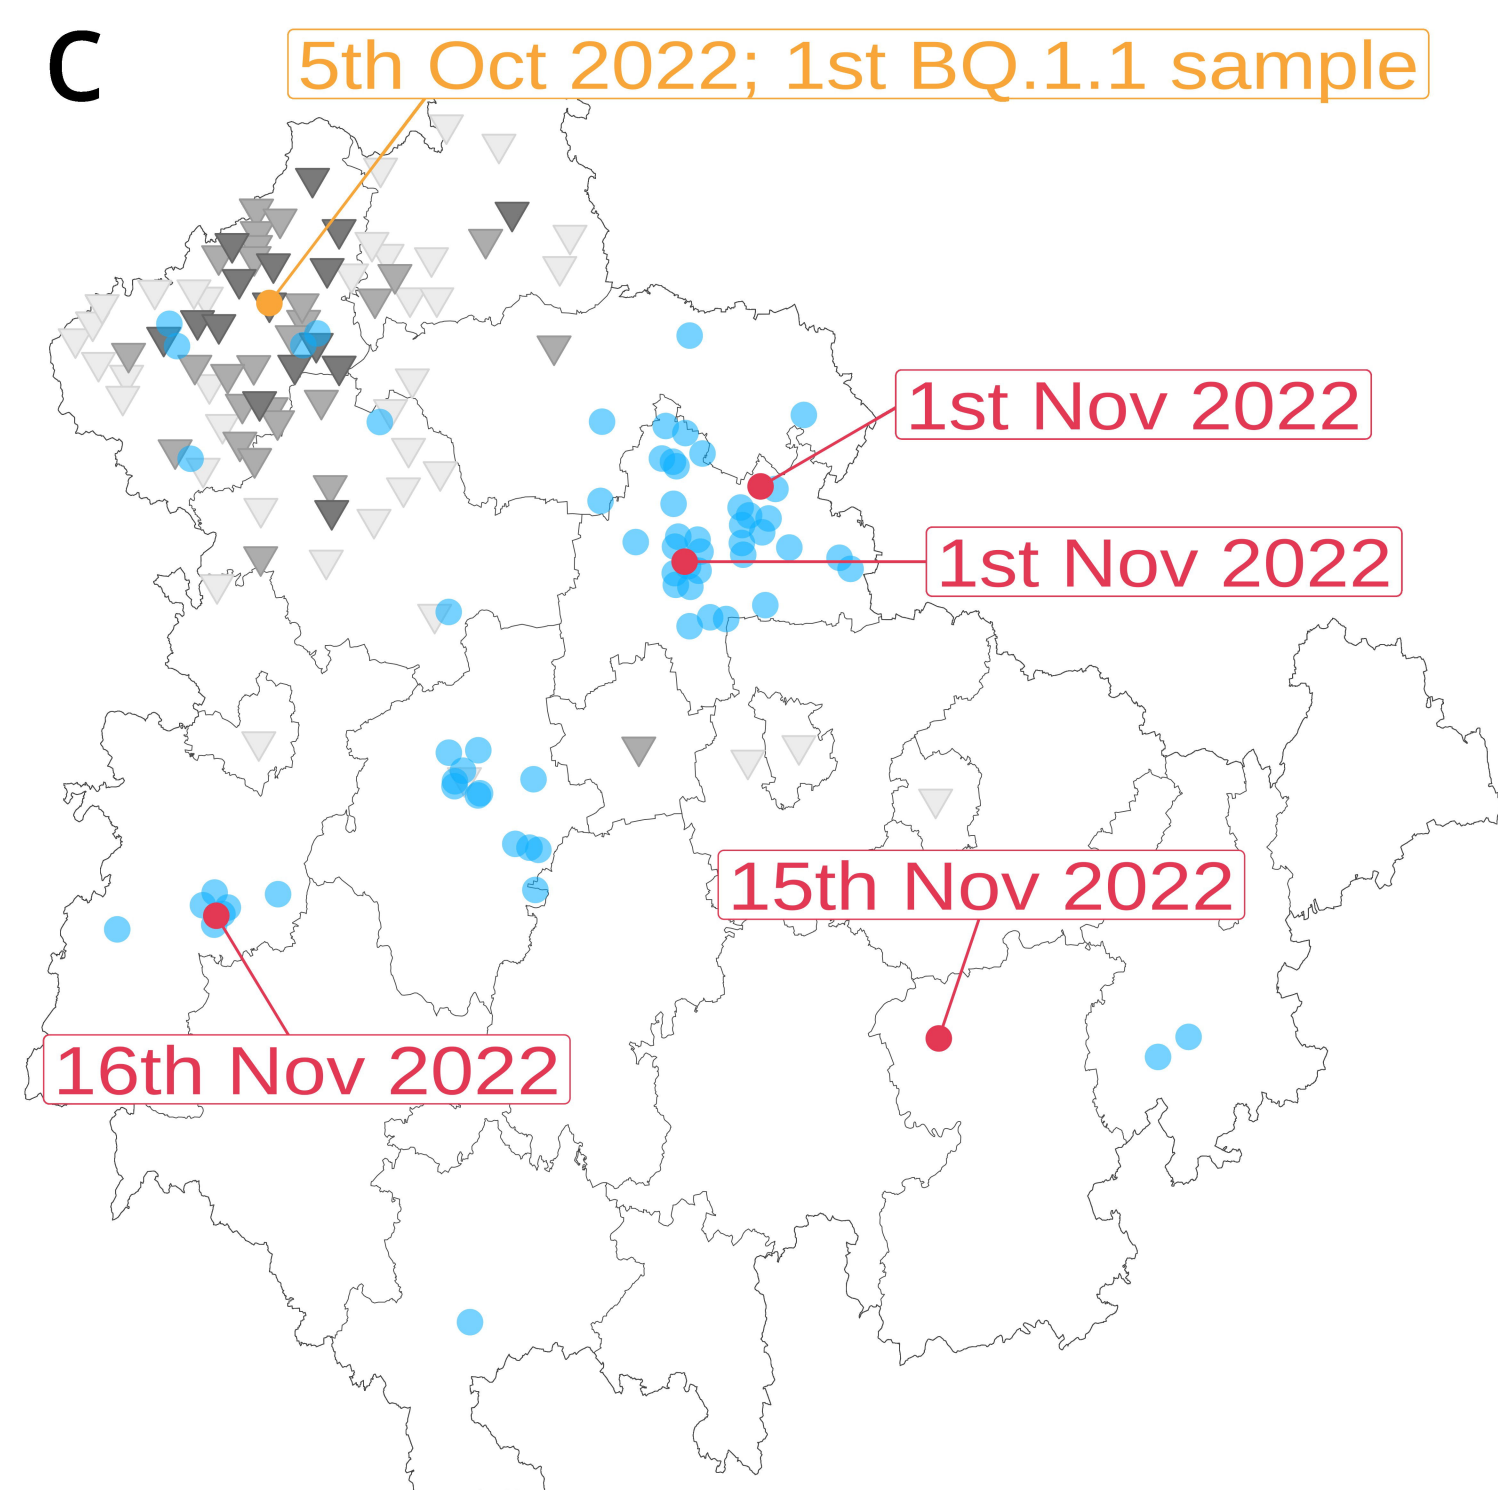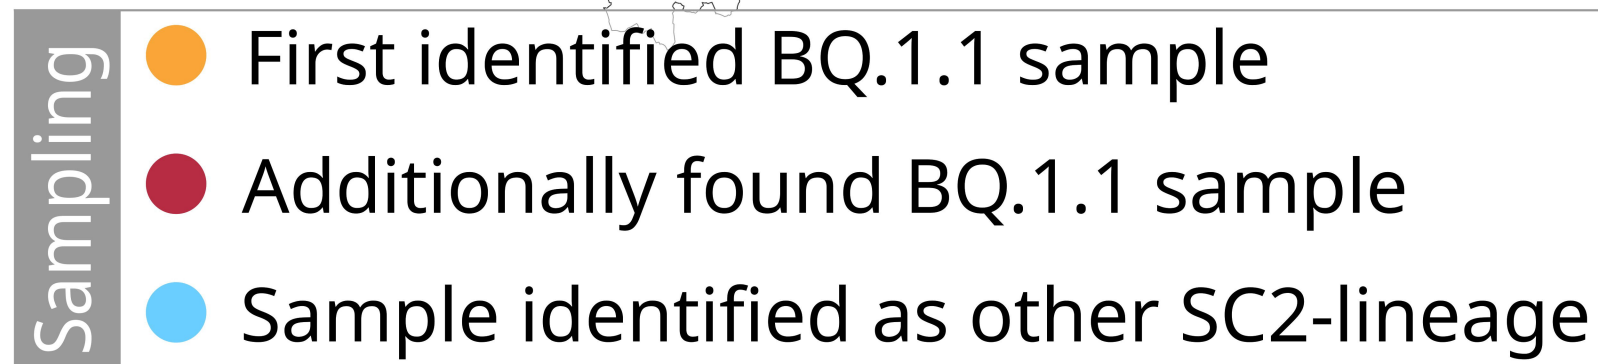

one-way trips  
from BQ.1.1 origin  
(~ 20,000 inhabitants)
